# Supplementary material for: Protein Expression Profiling of Giant Cell Tumors of Bone Treated with Denosumab
Source: PLoS One. 2016 Feb 10;11(2):e0148401. doi: 10.1371/journal.pone.0148401 (PMC4749282; doi:10.1371/journal.pone.0148401)
Supplement: S11 Table — (XLSX) [file pone.0148401.s011.xlsx]

## Sheet: S11 Table
Patient no.	Tumor type	Sex	Age	Site	Surgery	Total follow up (months)	a Outcome (months)	MMP-9 (mononuclear cells)
1	Conventional	M	36	Distal femur	Curettage	73	71	2
2	Conventional	M	23	Distal femur	Curettage	192	191	1
3	Conventional	F	31	Proximal tibia	Curettage	180	171	2
4	Conventional	F	19	Distal femur	Curettage	109	Recur (101mos)	3
5	Conventional	F	56	Proximal tibia	Curettage	0	90	2
6	Conventional	F	56	Proximal fibula	Curettage	69	63	2
7	Conventional	F	20	Proximal tibia	Curettage	115	93	3
8	Conventional	F	22	Distal radius	Resection	0	1	3
9	Conventional	F	46	Proximal fibula	Resection	0	1	3
10	Conventional	M	73	Distal ulna	Curettage	0	1	2
11	Conventional	F	20	Proximal fibula	Resection	52	50	2
12	Conventional	M	28	Distal femur	Curettage	11	8	2
13	Conventional	M	23	Distal femur	Curettage	1	14	2
14	Conventional	M	58	Ilium	Curettage	24	23	2
15	Conventional	M	32	metatarsal of hallux	Resection	50	49	2
16	Conventional	M	52	Distal femur	Curettage	58	57	2
17	Conventional	M	35	Vertebra	Resection	53	53	3
18	Conventional	M	19	Distal femur	Curettage	3	1	1
19	Conventional	M	42	Proximal femur	Resection	42	42	1
20	Conventional	M	25	Distal femur	Resection	42	42	1
21	Conventional	M	44	Proximal humeral	Curettage	43	Recur (22mos)	3
22	Conventional	M	37	Proximal radius	Resection	26	25	2
23	Conventional	M	33	Distal femur	Curettage	1	9	2
24	Conventional	M	20	Proximal tibia	Curettage	1	6	2
25	Conventional	F	72	Distal femur	Curettage	5	4	2
26	Conventional	M	50	Distal femur	Curettage	3	1	3
27	Conventional	M	31	Distal femur	Curettage	15	14	2
28	Conventional	F	19	Proximal tibia	Curettage	25	24	3
29	Conventional	F	39	Rib	Resection	23	22	2
30	Conventional	F	44	Distal femur	Curettage	23	21	3
31	Conventional	F	35	Vertebra	Resection	0	Recur (116mos)	2
32	Conventional	F	29	Distal radius	Curettage	93	Recur (12mos)	2
33	Conventional	M	23	Vertebra	Resection	20	Recur (19mos)	3
34	Conventional	M	28	Distal femur	Curettage	80	Recur (9mos)	1
35	Malignant	F	18	Distal radius	Curettage	48	Recur (6mos)	3
a NER: no evidence of recurrence, Recur: recurrence
